# Supplementary material
Source: Research Square preprint supplement (doi:10.21203/rs.3.rs-9392776/v1)
Supplement: Supplementary file 1 [file 5bd6bb844528f27ad57c7ec5.docx]

**Supplementary Material**

Toward a Geochemical Model for Directional Chiral Selection:

Peptide β-Sheet Nucleation at Chiral Mineral–Seawater Interfaces as a Candidate Mechanism

**Masato MIYAKE**

## Table S1. β-sheet periodicity vs mineral lattice spacing

| **Structure** | **Spacing (Å)** | **Notes** | **Refs** |
| --- | --- | --- | --- |
| β-sheet interstrand | ~4.7 | Cross-β H-bonded packing; robust across sequences | 16–18 |
| Calcite {21̄1} | ~4.99 | Chiral scalenohedral faces; enantioselective adsorption demonstrated | 30 |
| Greigite (Fe₃S₄) | ~4.7–5.0* | *Estimated from bulk a ≈ 9.88 Å; face-dependent; no aqueous surface data | 27,29 |
| Mackinawite (FeS) | ~3.7–4.0 | Layered structure; poor geometric match to β-sheet | 29 |

*Note:* Mineral spacings are from bulk crystallographic data. Surface spacings in aqueous environments may differ due to reconstruction and hydration layers. The designation ‘comparable’ indicates a potential geometric relationship warranting investigation, not established commensurability.
